# Supplementary material for: Assessing the Genotype-by-Environment G×E Interaction in Desi Chickpea via the Bayesian Additive Main Effects and Multiplicative Interaction Model
Source: MDPI journal article supplement (doi:10.3390/agriculture14020215), 2024-01-29
Supplement: s1 [file s1]

## Supplementary Figures

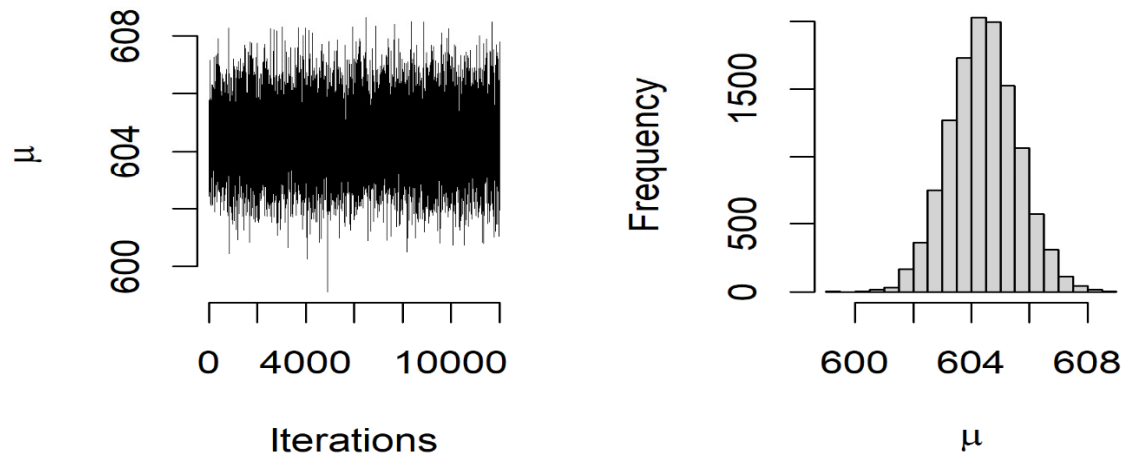

**Figure S1.** Trace and histogram of the overall mean ( $\mu$ ) obtained from the Bayesian-AMMI model for a chickpea yield dataset comprised of 36 genotypes evaluated in 12 environments in Pakistan.

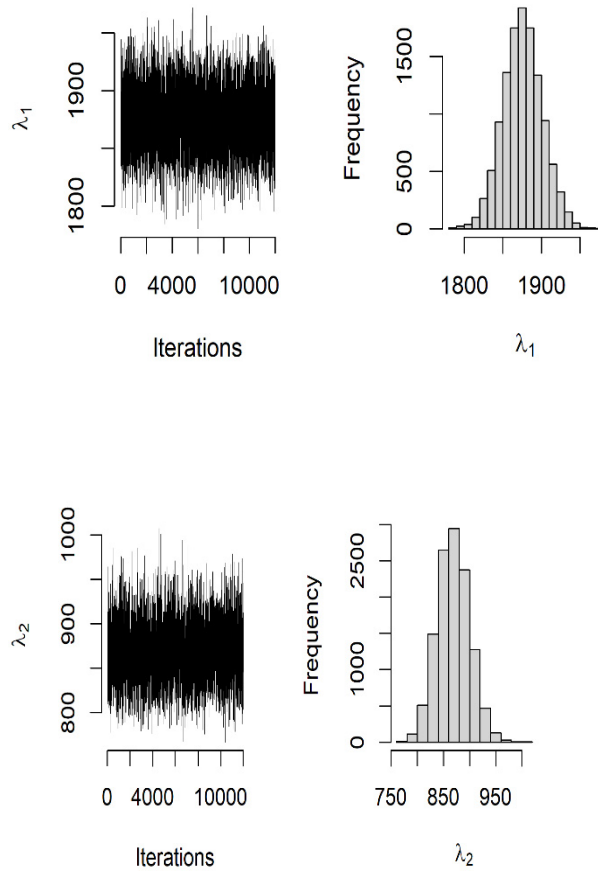

**Figure S2.** Traces and histograms of values of the first and second singular values ( $\lambda_1$  and  $\lambda_2$ ) obtained from the Bayesian-AMMI model for a chickpea yield data set comprised of 36 genotypes evaluated in 12 environments in Pakistan.

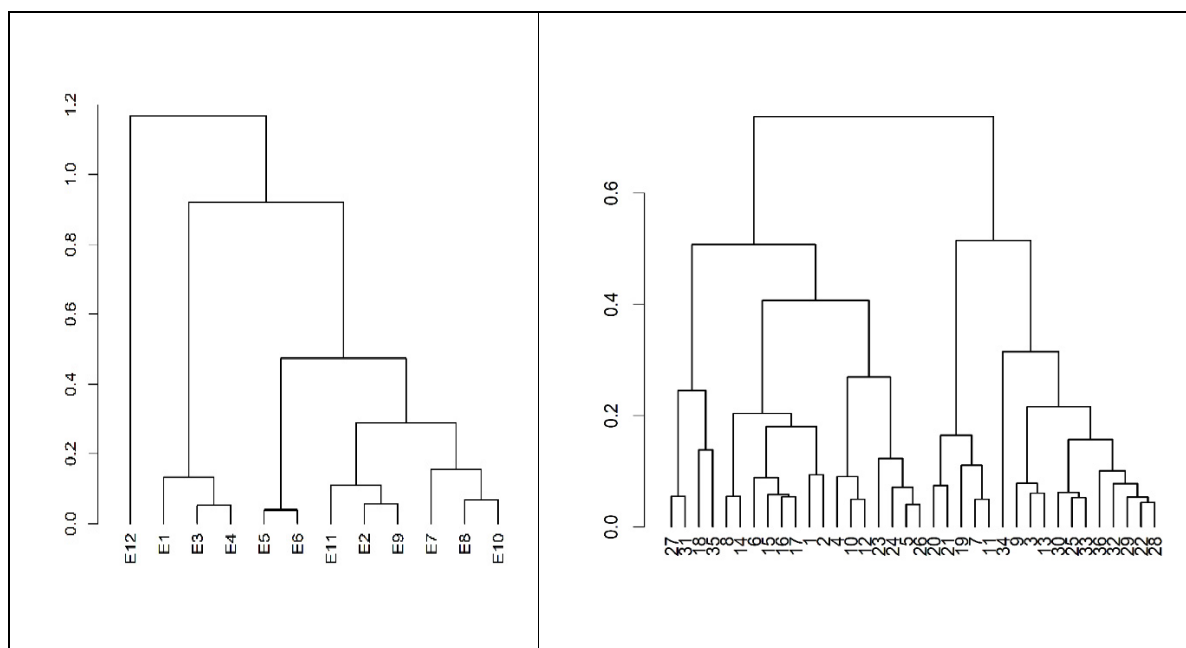

**Figure S3.** Clustering of genotypes and environments based on the interaction parameters derived from the Bayesian-AMMI model for a chickpea

yield dataset comprised of 36 genotypes observed in 12 environments in Pakistan.

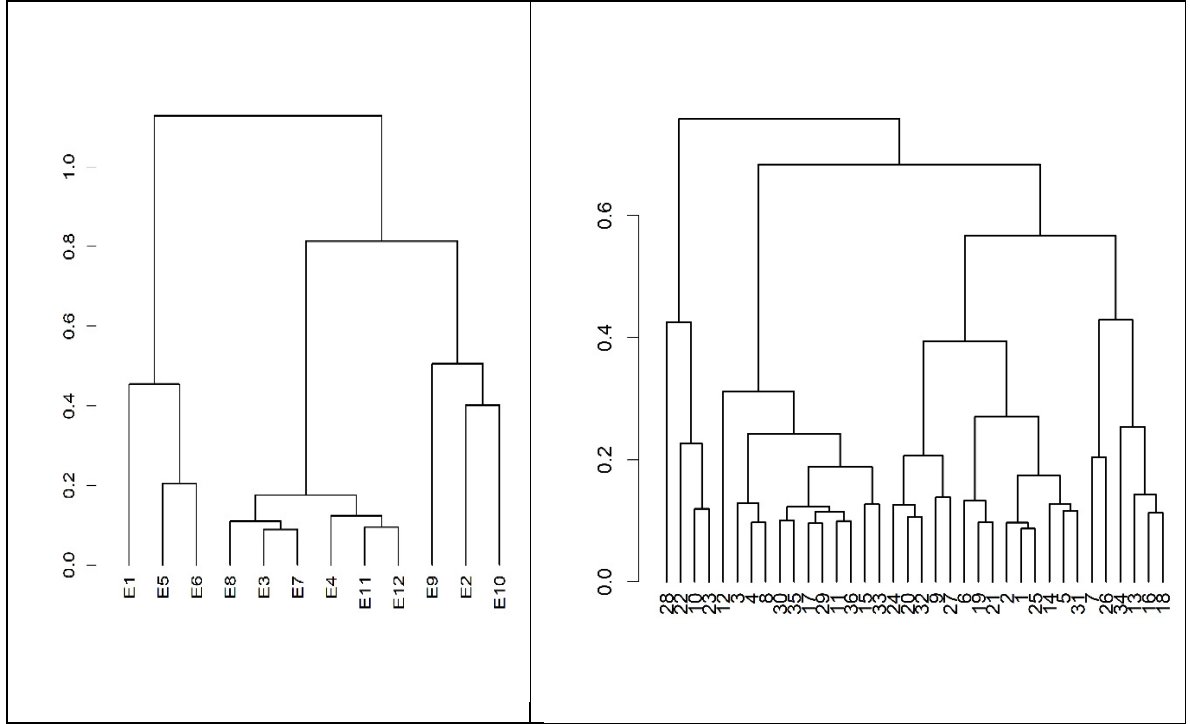

**Figure S4.** Clustering of genotypes and environments based on the interaction parameters derived from the Bayesian-AMMI model for a chickpea DTE dataset comprised of 36 genotypes observed in 12 environments in Pakistan.

## Supplementary Tables

**Table S1.** Mean of the marginal posterior effects, and their corresponding standard deviations (SDs), and 95% highest posterior density HPD regions for the overall mean ( $\mu$ ), dispersion parameter ( $\sigma^2_e$ ), genotypic effects ( $\tau_i$ ), environmental effects ( $\delta_j$ ) derived of the Bayesian-AMMI model for DTE of a chickpea dataset comprised of 36 genotypes observed in 12 environments.

| Parameter    | Mean  | SD   | Lower HPD | Upper HPD | Parameter   | Mean  | SD   | Lower HPD | Upper HPD |
|--------------|-------|------|-----------|-----------|-------------|-------|------|-----------|-----------|
| $\mu$        | 15.36 | 0.02 | 15.33     | 15.39     | $\tau_{24}$ | -0.31 | 0.31 | -0.90     | 0.31      |
| $\sigma^2_e$ | 0.37  | 0.03 | 0.32      | 0.42      | $\tau_{25}$ | -0.22 | 0.32 | -0.82     | 0.41      |
| $\tau_1$     | -0.89 | 0.31 | -1.51     | -0.29     | $\tau_{26}$ | -0.36 | 0.32 | -0.99     | 0.25      |
| $\tau_2$     | -1.20 | 0.32 | -1.84     | -0.60     | $\tau_{27}$ | 1.05  | 0.32 | 0.45      | 1.67      |
| $\tau_3$     | -0.11 | 0.31 | -0.74     | 0.47      | $\tau_{28}$ | -0.28 | 0.32 | -0.91     | 0.31      |
| $\tau_4$     | 0.50  | 0.31 | -0.13     | 1.07      | $\tau_{29}$ | 0.03  | 0.32 | -0.57     | 0.64      |
| $\tau_5$     | -0.45 | 0.32 | -1.08     | 0.16      | $\tau_{30}$ | 1.27  | 0.32 | 0.62      | 1.86      |
| $\tau_6$     | -0.11 | 0.31 | -0.75     | 0.48      | $\tau_{31}$ | 0.72  | 0.32 | 0.11      | 1.35      |
| $\tau_7$     | -0.25 | 0.32 | -0.87     | 0.38      | $\tau_{32}$ | 1.18  | 0.32 | 0.53      | 1.79      |
| $\tau_8$     | 0.22  | 0.31 | -0.37     | 0.85      | $\tau_{33}$ | -0.01 | 0.31 | -0.61     | 0.59      |
| $\tau_9$     | -0.28 | 0.32 | -0.90     | 0.33      | $\tau_{34}$ | -0.28 | 0.32 | -0.88     | 0.35      |
| $\tau_{10}$  | 0.30  | 0.32 | -0.29     | 0.95      | $\tau_{35}$ | -0.25 | 0.31 | -0.84     | 0.36      |
| $\tau_{11}$  | 0.03  | 0.32 | -0.58     | 0.66      | $\tau_{36}$ | -0.11 | 0.32 | -0.71     | 0.53      |
| $\tau_{12}$  | -0.84 | 0.32 | -1.42     | -0.19     | $\delta_1$  | -2.86 | 0.31 | -3.49     | -2.27     |

|             |       |      |       |      |               |       |      |       |       |
|-------------|-------|------|-------|------|---------------|-------|------|-------|-------|
| $\tau_{13}$ | -0.56 | 0.31 | -1.18 | 0.03 | $\delta_2$    | 11.93 | 0.30 | 11.34 | 12.52 |
| $\tau_{14}$ | -0.03 | 0.31 | -0.64 | 0.57 | $\delta_3$    | -5.22 | 0.30 | -5.80 | -4.59 |
| $\tau_{15}$ | -0.42 | 0.31 | -1.04 | 0.18 | $\delta_4$    | 4.40  | 0.31 | 3.79  | 5.01  |
| $\tau_{16}$ | -0.48 | 0.32 | -1.08 | 0.12 | $\delta_5$    | -5.19 | 0.31 | -5.81 | -4.61 |
| $\tau_{17}$ | -0.14 | 0.32 | -0.77 | 0.46 | $\delta_6$    | 5.01  | 0.30 | 4.41  | 5.62  |
| $\tau_{18}$ | -0.31 | 0.32 | -0.93 | 0.29 | $\delta_7$    | -4.24 | 0.31 | -4.80 | -3.62 |
| $\tau_{19}$ | 0.19  | 0.32 | -0.46 | 0.77 | $\delta_8$    | 5.65  | 0.31 | 5.06  | 6.25  |
| $\tau_{20}$ | 0.50  | 0.31 | -0.11 | 1.11 | $\delta_9$    | -6.72 | 0.31 | -7.31 | -6.10 |
| $\tau_{21}$ | 0.72  | 0.31 | 0.12  | 1.34 | $\delta_{10}$ | -2.65 | 0.31 | -3.25 | -2.07 |
| $\tau_{22}$ | 0.53  | 0.31 | -0.07 | 1.14 | $\delta_{11}$ | -4.81 | 0.30 | -5.42 | -4.23 |
| $\tau_{23}$ | 0.67  | 0.31 | 0.06  | 1.28 | $\delta_{12}$ | 4.68  | 0.30 | 4.08  | 5.28  |
